# Supplementary material for: An Activated Dendritic-Cell-Related Gene Signature Indicative of Disease Prognosis and Chemotherapy and Immunotherapy Response in Colon Cancer Patients
Source: Int J Mol Sci. 2023 Nov 3;24(21):15959. doi: 10.3390/ijms242115959 (PMC10647347; doi:10.3390/ijms242115959)
Supplement: Supplementary file 1 [file ijms-24-15959-s001.zip › ijms-2605913-supplementary.pdf]

## *Supplementary Material*

# **An Activated Dendritic Cell-Related Gene Signature Indicative of Disease Prognosis and Chemotherapy and Immunotherapy Response in Colon Cancer Patients**

**Yiben Ouyang<sup>1,†</sup>, Mingqian Yu<sup>1,†</sup>, Tiange Liu<sup>1</sup>, Mengying Suo<sup>1</sup>, Jingyi Qiao<sup>1</sup>, Liqiang Wang<sup>1,\*</sup> and Na Li<sup>1,\*</sup>**

<sup>1</sup> School of Medicine, Nankai University, Tianjin 300071 China; [ed1501260@163.com](mailto:ed1501260@163.com) (Y.O.); [mingqianyu2022@163.com](mailto:mingqianyu2022@163.com) (M.Y.); [nimbus2000e@163.com](mailto:nimbus2000e@163.com) (T.L.); [15866725760@163.com](mailto:15866725760@163.com) (M.S.); [18092289178@163.com](mailto:18092289178@163.com) (J.Q.)

† These authors contributed equally to this work.

\* Correspondence: [liqiangw301@163.com](mailto:liqiangw301@163.com) (L.W.) ; [lina08@nankai.edu.cn](mailto:lina08@nankai.edu.cn) (N.L.)

## **1 Supplementary Figures and Tables**

### **1.1 Supplementary Figures**

| Input Samples | 8-Cell naive | 8-Cell memory | Plasma naive | 1-Cell CD4 | 1-Cell CD4 naive | 1-Cell CD4 memory/naive | 1-Cell CD4 memory/activated | 1-Cell follicular helper | 1-Cell regulatory (Th1/Th2) | 1-Cell gamma delta | MF cells resting | MF cells activated | Monocytes | Macrophage M0 | Macrophage M1 | Macrophage M2 | Dendritic cells resting | Dendritic cells activated | MF cells resting | MF cells activated | Leukocytes | Neutrophils | Platelets | Plasma convalescent |
|---------------|--------------|---------------|--------------|------------|------------------|-------------------------|-----------------------------|--------------------------|-----------------------------|--------------------|------------------|--------------------|-----------|---------------|---------------|---------------|-------------------------|---------------------------|------------------|--------------------|------------|-------------|-----------|---------------------|
| GSMP072056    | 0.0422       | 0             | 0.1285       | 0.0634     | 0                | 0.016                   | 0.0013                      | 0.0079                   | 0.0956                      | 0                  | 0.0963           | 0                  | 0         | 0.0424        | 0.028         | 0.069         | 0.0433                  | 0.0376                    | 0                | 0.2257             | 0          | 0.0338      | 0.011     | 0.2155              |
| GSMP072055    | 0.0083       | 0             | 0.2305       | 0.1354     | 0                | 0.0909                  | 0                           | 0.0529                   | 0.0126                      | 0                  | 0.0162           | 0.0351             | 0         | 0.0809        | 0.0734        | 0.1413        | 0.0826                  | 0                         | 0                | 0.0257             | 0          | 0.0144      | 0.001     | 0.3769              |
| GSMP072054    | 0.0327       | 0             | 0.1148       | 0          | 0.0079           | 0.0666                  | 0                           | 0.061                    | 0.0102                      | 0.0892             | 0.0605           | 0                  | 0         | 0.0981        | 0.0664        | 0.1503        | 0                       | 0.0915                    | 0                | 0.1027             | 0          | 0.001       | 0.3458    | 0                   |
| GSMP072053    | 0            | 0.1262        | 0.1289       | 0.0571     | 0                | 0                       | 0.0608                      | 0.0865                   | 0.0216                      | 0                  | 0.0837           | 0                  | 0.0238    | 0.0753        | 0.1186        | 0.0289        | 0.0672                  | 0.053                     | 0                | 0.0683             | 0          | 0           | 0.019     | 0.1841              |
| GSMP072052    | 0.0496       | 0             | 0.3343       | 0          | 0.0884           | 0                       | 0.0819                      | 0.0556                   | 0.0204                      | 0                  | 0.0645           | 0                  | 0         | 0.0516        | 0.0643        | 0.0706        | 0.026                   | 0.0274                    | 0                | 0.0695             | 0          | 0           | <0.001    | 0.3829              |
| GSMP072051    | 0.017        | 0             | 0.0971       | 0          | 0                | 0.0753                  | 0.0484                      | 0.0267                   | 0.0029                      | 0                  | 0.09             | 0                  | 0         | 0.1698        | 0.0444        | 0.2346        | 0.021                   | 0.0279                    | 0                | 0.1293             | 0          | 0.0155      | 0.005     | 0.2792              |
| GSMP072050    | 0.0394       | 0             | 0.4242       | 0.0084     | 0.0181           | 0.1563                  | 0                           | 0.0401                   | 0.0312                      | 0                  | 0.0403           | 0                  | 0.0204    | 0.0112        | 0             | 0.0259        | 0.0097                  | 0.0466                    | 0                | 0.1123             | 0.0158     | 0           | <0.001    | 0.4819              |
| GSMP072049    | 0            | 0.0788        | 0.0858       | 0          | 0.0126           | 0.1829                  | 0                           | 0.0183                   | 0.0037                      | 0                  | 0.1113           | 0                  | 0         | 0.1499        | 0.0162        | 0.0837        | 0.0033                  | 0.0374                    | 0                | 0.2146             | 0          | 0.0014      | 0.049     | 0.1489              |
| GSMP072048    | 0            | 0             | 0.3068       | 0          | 0.0607           | 0.1488                  | 0                           | 0.0163                   | 0                           | 0                  | 0.1109           | 0                  | 0         | 0.0933        | 0.0129        | 0.0715        | 0.0505                  | 0.0337                    | 0                | 0.0946             | 0          | 0           | 0.012     | 0.21                |
| GSMP072047    | 0            | 0             | 0.1342       | 0          | 0.0841           | 0.1102                  | 0                           | 0.0077                   | 0.0092                      | 0                  | 0.0888           | 0                  | 0         | 0.1371        | 0.0141        | 0.137         | 0.1361                  | 0.0188                    | 0.0486           | 0.0741             | 0          | 0           | 0.007     | 0.2529              |
| GSMP072046    | 0.0314       | 0             | 0.1366       | 0.0216     | 0                | 0.1778                  | 0.0248                      | 0.0487                   | 0.019                       | 0.079              | 0.0086           | 0                  | 0         | 0.1038        | 0.0604        | 0.2032        | 0.0286                  | 0                         | 0                | 0.0455             | 0          | 0.011       | <0.001    | 0.3783              |
| GSMP072045    | 0.1086       | 0             | 0.1077       | 0          | 0                | 0.1026                  | 0                           | 0.1041                   | 0.0398                      | 0                  | 0.1233           | 0                  | 0         | 0.0442        | 0.0034        | 0.079         | 0.0387                  | 0.0464                    | 0                | 0.1947             | 0.0016     | 0           | 0.092     | 0.1753              |
| GSMP072044    | 0            | 0.0313        | 0.0961       | 0.0361     | 0                | 0.049                   | 0                           | 0.0203                   | 0.0637                      | 0                  | 0.143            | 0                  | 0.0066    | 0.0682        | 0.0091        | 0.0887        | 0.0829                  | 0.0281                    | 0                | 0.2314             | 0          | 0.0355      | 0.092     | 0.1179              |
| GSMP072043    | 0            | 0.0718        | 0.0663       | 0          | 0.0199           | 0.1526                  | 0.1478                      | 0                        | 0.0081                      | 0                  | 0.1055           | 0                  | 0         | 0.1639        | 0.0247        | 0.0839        | 0.0358                  | 0.0209                    | 0                | 0.0743             | 0.0247     | 0           | 0.115     | 0.109               |
| GSMP072042    | 0            | 0.006         | 0.402        | 0.0038     | 0                | 0.1146                  | 0                           | 0.0093                   | 0.0471                      | 0.0106             | 0.0527           | 0                  | 0         | 0.0742        | 0.0423        | 0.0895        | 0.0267                  | 0.0599                    | 0                | 0.0603             | 0          | 0.001       | <0.001    | 0.4486              |
| GSMP072041    | 0            | 0.0532        | 0.0596       | 0          | 0.0009           | 0.0233                  | 0.0697                      | 0.0656                   | 0.019                       | 0                  | 0.0889           | 0                  | 0         | 0.2005        | 0.0384        | 0.0686        | 0.0143                  | 0.0445                    | 0                | 0.2029             | 0          | 0.0446      | 0.025     | 0.1779              |
| GSMP072040    | 0            | 0.0028        | 0.1215       | 0          | 0.0181           | 0.1582                  | 0.0557                      | 0.0244                   | 0                           | 0                  | 0.1313           | 0                  | 0.0002    | 0.113         | 0.0184        | 0.1067        | 0.0734                  | 0.0635                    | 0                | 0.1127             | 0          | 0           | 0.183     | 0.085               |
| GSMP072039    | 0.0194       | 0             | 0.3936       | 0.0277     | 0                | 0.0643                  | 0.0133                      | 0.0513                   | 0                           | 0.0465             | 0.0245           | 0                  | 0.0371    | 0.0174        | 0.0121        | 0.0627        | 0                       | 0.034                     | 0.0169           | 0.1555             | 0          | 0.0235      | <0.001    | 0.4911              |
| GSMP072038    | 0.0349       | 0             | 0.0934       | 0          | 0                | 0.0218                  | 0.0529                      | 0.0909                   | 0.018                       | 0.0604             | 0.072            | 0                  | 0         | 0.0473        | 0.04          | 0.1355        | 0.0275                  | 0.1499                    | 0                | 0.1436             | 0.0076     | 0.0042      | 0.063     | 0.1354              |
| GSMP072037    | 0            | 0.0224        | 0.273        | 0          | 0.012            | 0.0866                  | 0                           | 0.0839                   | 0                           | 0                  | 0.0772           | 0                  | 0         | 0.0676        | 0.0425        | 0.0577        | 0.0158                  | 0.0526                    | 0                | 0.1892             | 0          | 0.0195      | 0.001     | 0.34                |
| GSMP072036    | 0.027        | 0             | 0.2053       | 0.0491     | 0                | 0.1508                  | 0.0722                      | 0.0247                   | 0.0227                      | 0                  | 0.1029           | 0                  | 0         | 0.0749        | 0.0407        | 0.0935        | 0.0238                  | 0.0018                    | 0                | 0.0933             | 0          | 0.0054      | 0.007     | 0.2613              |
| GSMP072035    | 0            | 0.021         | 0.1324       | 0.0163     | 0                | 0.1499                  | 0.0262                      | 0.0146                   | 0.0135                      | 0                  | 0.132            | 0                  | 0.0001    | 0             | 0.016         | 0.1932        | 0.1173                  | 0.0595                    | 0                | 0.1029             | 0          | 0           | 0.337     | 0.0486              |
| GSMP072034    | 0            | 0.0523        | 0.2761       | 0.0169     | 0.0344           | 0.0373                  | 0.0128                      | 0                        | 0.0672                      | 0                  | 0.0947           | 0                  | 0         | 0.0241        | 0.0401        | 0.1031        | 0.0571                  | 0.053                     | 0                | 0.1311             | 0          | 0           | 0.01      | 0.2264              |
| GSMP072033    | 0.0886       | 0             | 0.0889       | 0          | 0.0905           | 0                       | 0.104                       | 0.078                    | 0.0686                      | 0                  | 0.1062           | 0                  | 0         | 0.0463        | 0.0193        | 0.0123        | 0.0787                  | 0                         | 0                | 0.1912             | 0          | 0.0274      | 0.588     | 0.0151              |
| GSMP072032    | 0.0216       | 0.0025        | 0.1231       | 0          | 0.0818           | 0.217                   | 0.073                       | 0.0568                   | 0                           | 0.0066             | 0.0788           | 0                  | 0         | 0.1036        | 0.0178        | 0.0693        | 0.0102                  | 0.0309                    | 0                | 0.1069             | 0          | 0           | 0.035     | 0.1638              |
| GSMP072031    | 0            | 0             | 0.209        | 0          | 0.0242           | 0.1008                  | 0.0349                      | 0.0492                   | 0.0208                      | 0                  | 0.0772           | 0                  | 0.0027    | 0.1781        | 0.048         | 0.1001        | 0.0283                  | 0.0183                    | 0                | 0.1084             | 0          | 0           | 0.009     | 0.2355              |
| GSMP072030    | 0            | 0.0059        | 0.2414       | 0.0335     | 0.0665           | 0.0261                  | 0                           | 0.0156                   | 0.0086                      | 0                  | 0.0663           | 0                  | 0.0197    | 0.1793        | 0.0397        | 0.1528        | 0.0077                  | 0.0434                    | 0                | 0.0768             | 0          | 0.017       | <0.001    | 0.4743              |
| GSMP072029    | 0.0475       | 0             | 0.1846       | 0.0577     | 0.0328           | 0.087                   | 0.0373                      | 0.0325                   | 0                           | 0                  | 0.0978           | 0                  | 0         | 0.172         | 0.0136        | 0.0888        | 0.0143                  | 0                         | 0.0169           | 0.1172             | 0          | 0           | <0.001    | 0.4223              |
| GSMP072028    | 0.0085       | 0             | 0.2878       | 0.0723     | 0.0143           | 0.0848                  | 0                           | 0.0392                   | 0.0143                      | 0                  | 0.0849           | 0                  | 0         | 0.001         | 0.0227        | 0.1171        | 0.047                   | 0.0445                    | 0                | 0.1111             | 0          | 0.0505      | <0.001    | 0.518               |
| GSMP072027    | 0            | 0.0987        | 0.131        | 0.0056     | 0.0626           | 0                       | 0.0609                      | 0.0377                   | 0                           | 0                  | 0.0926           | 0                  | 0         | 0.2194        | 0             | 0.1018        | 0.004                   | 0.0511                    | 0                | 0.1168             | 0          | 0.0177      | 0.068     | 0.131               |
| GSMP072026    | 0.0471       | 0             | 0.0999       | 0.0502     | 0.0527           | 0                       | 0.1038                      | 0.025                    | 0                           | 0                  | 0.0588           | 0.0266             | 0         | 0             | 0.0445        | 0.0235        | 0.0853                  | 0.0151                    | 0                | 0.1584             | 0.0001     | 0           | <0.001    | 0.456               |
| GSMP072025    | 0            | 0             | 0.2931       | 0.0989     | 0                | 0.1686                  | 0                           | 0.0155                   | 0.005                       | 0                  | 0.0427           | 0                  | 0         | 0.0025        | 0.0257        | 0.1078        | 0.092                   | 0.0149                    | 0                | 0.1246             | 0.005      | 0.0038      | 0.001     | 0.3146              |
| GSMP072024    | 0            | 0.0188        | 0.0951       | 0.0217     | 0                | 0.1769                  | 0                           | 0.0429                   | 0.071                       | 0                  | 0.1197           | 0                  | 0         | 0.1269        | 0.0073        | 0.05          | 0.0419                  | 0.032                     | 0                | 0.1959             | 0          | 0           | 0.214     | 0.0756              |
| GSMP072023    | 0.0714       | 0             | 0.1094       | 0          | 0.0419           | 0.1018                  | 0                           | 0                        | 0.026                       | 0.0854             | 0                | 0                  | 0.1843    | 0.0171        | 0.0644        | 0             | 0.0078                  | 0                         | 0.2811           | 0                  | 0.0095     | 0.01        | 0.2316    | 0                   |
| GSMP072022    | 0            | 0.024         | 0.2109       | 0.1138     | 0                | 0.1308                  | 0                           | 0.0644                   | 0.0297                      | 0                  | 0.0028           | 0.0123             | 0         | 0.0744        | 0.0813        | 0.1569        | 0.0617                  | 0.0017                    | 0.0019           | 0.0258             | 0          | 0.0076      | <0.001    | 0.4636              |
| GSMP072021    | 0            | 0.0203        | 0.1063       | 0.013      | 0                | 0.1338                  | 0                           | 0.0976                   | 0.0014                      | 0                  | 0.0673           | 0                  | 0         | 0.1826        | 0.0696        | 0.1685        | 0.0206                  | 0                         | 0                | 0.1143             | 0          | 0.0047      | 0.007     | 0.262               |
| GSMP072020    | 0.0223       | 0             | 0.3144       | 0          | 0                | 0.1229                  | 0.0398                      | 0.0637                   | 0                           | 0                  | 0.0628           | 0                  | 0         | 0.0419        | 0.0602        | 0.0898        | 0.0563                  | 0.0276                    | 0.0464           | 0.0319             | 0.0156     | 0.0044      | <0.001    | 0.4286              |
| GSMP072019    | 0.0367       | 0             | 0.1984       | 0.0671     | 0                | 0.0704                  | 0.0312                      | 0.1481                   | 0                           | 0.0887             | 0                | 0                  | 0         | 0.0583        | 0.0991        | 0.0867        | 0.0333                  | 0.0145                    | 0                | 0.0675             | 0          | 0           | <0.001    | 0.5598              |
| GSMP072018    | 0            | 0             | 0.1094       | 0          | 0                | 0.0323                  | 0.0056                      | 0.0995                   | 0.0053                      | 0                  | 0                | 0.057              | 0         | 0.0866        | 0.0666        | 0.1507        | 0.0656                  | 0.0031                    | 0                | 0.1036             | 0.0029     | 0.0717      | <0.001    | 0.4464              |
| GSMP072017    | 0            | 0.0027        | 0.0391       | 0.0132     | 0.0115           | 0.0445                  | 0.0231                      | 0.0531                   | 0.0171                      | 0.0808             | 0                | 0                  | 0.2549    | 0.026         | 0.1184        | 0             | 0                       | 0                         | 0                | 0.1036             | 0          | 0           | <0.001    | 0.4324              |
| GSMP072016    | 0.029        | 0             | 0.1453       | 0          | 0.0354           | 0.0586                  | 0                           | 0.0402                   | 0.0082                      | 0                  | 0.0556           | 0                  | 0         | 0.1886        | 0.0091        | 0.0888        | 0                       | 0.0238                    | 0                | 0.2755             | 0          | 0.0773      | 0.001     | 0.3992              |
| GSMP072015    | 0            | 0.0019        | 0.0341       | 0.0832     | 0                | 0.0172                  | 0.0174                      | 0.0441                   | 0.0651                      | 0                  | 0.0704           | 0                  | 0         | 0.1675        | 0.1297        | 0.1201        | 0.004                   | 0.0371                    | 0                | 0.1321             | 0          | 0.0671      | 0.045     | 0.1536              |
| GSMP072014    | 0            | 0.0044        | 0.0724       | 0.0232     | 0                | 0.0552                  | 0                           | 0.0422                   | 0.0349                      | 0                  | 0.0604           | 0                  | 0         | 0.0833        | 0.0425        | 0.1236        | 0.0362                  | 0.0285                    | 0                | 0.3237             | 0.0385     | 0.029       | 0.011     | 0.2162              |
| GSMP072013    | 0            | 0.0004        | 0.1786       | 0.0058     | 0.0137           | 0.105                   | 0.0569                      | 0.0178                   | 0.0023                      | 0                  | 0.1237           | 0                  | 0         | 0.0439        | 0.0252        | 0.1121        | 0.0044                  | 0.0377                    | 0                | 0.2036             | 0          | 0.0689      | 0.09      | 0.1196              |
| GSMP072012    | 0            | 0.2455        | 0            | 0.0082     | 0.2279           | 0                       | 0.018                       | 0                        | 0.0174                      | 0                  | 0.114            | 0                  | 0         | 0.1261        | 0.0224        | 0.089         | 0                       | 0.05                      | 0                | 0.1416             | 0          | 0           | 0.012     | 0.2998              |
| GSMP072011    | 0.0571       | 0             | 0.3067       | 0.0911     | 0                | 0.0192                  | 0                           | 0.0801                   | 0                           | 0.0401             | 0                | 0.012              | 0.0078    | 0.0393        | 0.1202        | 0.1219        | 0.0231                  | 0                         | 0.0046           | 0.0752             | 0.0015     | 0           | <0.001    | 0.5989              |
| GSMP072010    | 0.2867       | 0             | 0.1298       | 0.0475     | 0.0049           | 0.045                   | 0.067                       | 0.0243                   | 0                           | 0                  | 0.0333           | 0                  | 0         | 0.017         | 0.0304        | 0.1261        | 0                       | 0.0355                    | 0                | 0.2116             | 0.0192     | 0.0268      | 0.006     | 0.268               |
| GSMP072009    | 0.0306       | 0             | 0.3607       | 0.0623     | 0                | 0.0759                  | 0                           | 0.0722                   | 0                           | 0                  | 0.0482           | 0                  | 0         | 0.0094        | 0.0189        | 0.0723        | 0.0306                  | 0.0345                    | 0                | 0.1667             | 0.0101     | 0.0077      | <0.001    | 0.4954              |
| GSMP072008    | 0.0567       | 0             | 0.0833       | 0.0462     | 0.0221           | 0                       | 0.0271                      | 0.0141                   | 0.0144                      | 0                  | 0.0406           | 0                  | 0.0357    | 0.1081        | 0.0175        | 0.0196        | 0.0271                  | 0.0807                    | 0                | 0.0541             | 0.0162     | 0.0184      | <0.001    | 0.4661              |
| GSMP072007    | 0.0226       | 0             | 0.1767       | 0.0631     | 0                | 0.0462                  | 0                           | 0.0602                   | 0.0786                      | 0                  | 0.043            | 0                  | 0.0242    | 0.1252        | 0.0549        | 0.1591        | 0.0749                  | 0                         | 0                | 0.0648             | 0          | 0.0664      | <0.001    | 0.5188              |
| GSMP072006    | 0.0263       | 0             | 0.1861       | 0.0174     | 0                | 0.0841                  | 0.0165                      |                          |                             |                    |                  |                    |           |               |               |               |                         |                           |                  |                    |            |             |           |                     |

**CIBERSO  
scores**



CIBERS scores

5

| Input Samples | 1-cell nuclei | 8-cell memory | Plasma cells | 1-cell CD4 | 1-cell CD4 naive | 1-cell CD4 memory resting | 1-cell CD4 memory activated | 1-cell follicular helper | 1-cell regulatory (Th1p) | 1-cell gamma delta | NR cells resting | NR cells activated | Monocytes | Macrophages M0 | Macrophages M1 | Macrophages M2 | Dendritic cells resting | Dendritic cells activated | Mast cells resting | Mast cells activated | Eosinophils | Neutrophils | Platelets | Plasma coagulation |
|---------------|---------------|---------------|--------------|------------|------------------|---------------------------|-----------------------------|--------------------------|--------------------------|--------------------|------------------|--------------------|-----------|----------------|----------------|----------------|-------------------------|---------------------------|--------------------|----------------------|-------------|-------------|-----------|--------------------|
| GSMM92458     | 0.181         | 0             | 0.0572       | 0.0793     | 0                | 0.0253                    | 0.1312                      | 0.088                    | 0.0307                   | 0                  | 0.1165           | 0                  | 0         | 0.1144         | 0.1024         | 0.0941         | 0.0099                  | 0.0014                    | 0                  | 0.1127               | 0           | 0.019       | <0.001    | 0.4174             |
| GSMM92457     | 0.363         | 0             | 0.2641       | 0.0371     | 0                | 0.1016                    | 0                           | 0.0822                   | 0.0485                   | 0.0074             | 0.0947           | 0                  | 0.0156    | 0.0453         | 0.0279         | 0.0314         | 0.0156                  | 0.037                     | 0                  | 0.1352               | 0.0201      | 0           | 0.005     | 0.2759             |
| GSMM92456     | 0             | 0             | 0.2983       | 0.0997     | 0                | 0.0766                    | 0                           | 0.0338                   | 0.0227                   | 0                  | 0.0603           | 0                  | 0         | 0.0469         | 0.0638         | 0.2252         | 0.0636                  | 0.0442                    | 0                  | 0.0694               | 0           | 0.0405      | 0         | 0.3403             |
| GSMM92455     | 0.183         | 0             | 0.0451       | 0          | 0.0013           | 0.0846                    | 0                           | 0.0501                   | 0                        | 0                  | 0.0453           | 0                  | 0.0223    | 0.1491         | 0.0634         | 0.1007         | 0                       | 0.015                     | 0                  | 0.2856               | 0           | 0.119       | <0.001    | 0.5278             |
| GSMM92454     | 0.592         | 0             | 0.2815       | 0.0476     | 0                | 0.0755                    | 0.0594                      | 0.0783                   | 0                        | 0                  | 0.0545           | 0                  | 0         | 0.0853         | 0.0748         | 0.063          | 0.0186                  | 0                         | 0                  | 0.0874               | 0.0238      | 0           | <0.001    | 0.5691             |
| GSMM92453     | 0             | 0.0663        | 0.0561       | 0          | 0.0439           | 0.2422                    | 0                           | 0                        | 0.017                    | 0                  | 0.0908           | 0                  | 0         | 0.2197         | 0.0245         | 0.0481         | 0.0223                  | 0.0087                    | 0                  | 0.1604               | 0           | 0           | 0.052     | 0.1447             |
| GSMM92452     | 0.0326        | 0             | 0.1224       | 0.1303     | 0                | 0                         | 0.121                       | 0.0507                   | 0                        | 0.0043             | 0.0647           | 0                  | 0         | 0.1413         | 0.1072         | 0.1564         | 0                       | 0.0026                    | 0                  | 0.0582               | 0           | 0.0082      | <0.001    | 0.4903             |
| GSMM92451     | 0             | 0.0335        | 0.1058       | 0.0324     | 0                | 0.2395                    | 0.0106                      | 0                        | 0                        | 0.0832             | 0                | 0                  | 0         | 0.0788         | 0.0329         | 0.1002         | 0.1019                  | 0.012                     | 0                  | 0.1254               | 0           | 0.0437      | 0.088     | 0.1218             |
| GSMM92450     | 0.0563        | 0             | 0.1883       | 0.0341     | 0.0023           | 0.1552                    | 0.0104                      | 0.043                    | 0.0201                   | 0                  | 0.0888           | 0                  | 0         | 0.0682         | 0.0289         | 0.0558         | 0.0241                  | 0.041                     | 0                  | 0.1834               | 0           | 0           | 0.006     | 0.2706             |
| GSMM92449     | 0.059         | 0             | 0.1714       | 0          | 0.0654           | 0.1132                    | 0                           | 0.0574                   | 0.0666                   | 0                  | 0.0563           | 0                  | 0.0114    | 0.0211         | 0.0137         | 0.1354         | 0.0454                  | 0.0409                    | 0                  | 0.1431               | 0           | 0           | 0.001     | 0.3272             |
| GSMM92447     | 0.0371        | 0             | 0.1816       | 0          | 0                | 0.1149                    | 0                           | 0.0281                   | 0.0243                   | 0.0317             | 0.0817           | 0                  | 0         | 0.0509         | 0.024          | 0.1518         | 0.0112                  | 0.0288                    | 0                  | 0.1746               | 0.0435      | 0.0155      | 0.001     | 0.3452             |
| GSMM92445     | 0.141         | 0             | 0.0543       | 0.1928     | 0                | 0                         | 0.1157                      | 0.0732                   | 0                        | 0.0256             | 0.0091           | 0                  | 0         | 0.025          | 0.1157         | 0.0941         | 0.0093                  | 0.0032                    | 0                  | 0.1258               | 0.0052      | 0.0206      | 0.001     | 0.3755             |
| GSMM92444     | 0.201         | 0             | 0.314        | 0          | 0.0344           | 0.0191                    | 0.0373                      | 0.0617                   | 0                        | 0.1916             | 0.0598           | 0                  | 0         | 0.1732         | 0.1028         | 0.1088         | 0                       | 0.0199                    | 0                  | 0.0974               | 0           | 0.032       | <0.001    | 0.4944             |
| GSMM92443     | 0.0634        | 0             | 0.0755       | 0          | 0.0115           | 0.0394                    | 0.007                       | 0.0567                   | 0.0244                   | 0.051              | 0.081            | 0                  | 0         | 0.2924         | 0.0419         | 0.0965         | 0                       | 0.0238                    | 0                  | 0.1356               | 0           | 0           | 0.017     | 0.1913             |
| GSMM92442     | 0.1213        | 0.0107        | 0.1269       | 0.1443     | 0                | 0.1074                    | 0.0545                      | 0.0199                   | 0.009                    | 0.0186             | 0.0369           | 0                  | 0         | 0.0393         | 0.1626         | 0.1138         | 0.0252                  | 0                         | 0.0045             | 0.005                | 0           | 0           | <0.001    | 0.5796             |
| GSMM92441     | 0.252         | 0             | 0.1624       | 0.1015     | 0                | 0.1304                    | 0.0376                      | 0.0453                   | 0.0095                   | 0.0603             | 0.0496           | 0                  | 0         | 0.0445         | 0.0424         | 0.1743         | 0.0591                  | 0.0262                    | 0                  | 0.0868               | 0.0232      | 0.0128      | <0.001    | 0.5177             |
| GSMM92440     | 0.0605        | 0             | 0.2604       | 0.0254     | 0                | 0.0409                    | 0                           | 0.0673                   | 0.0058                   | 0.0312             | 0                | 0.0261             | 0         | 0.0861         | 0.1319         | 0.1287         | 0                       | 0.0012                    | 0                  | 0.1567               | 0           | 0.0317      | <0.001    | 0.396              |
| GSMM92439     | 0.0524        | 0             | 0.4072       | 0          | 0.0149           | 0.0859                    | 0.0976                      | 0.0174                   | 0                        | 0                  | 0.0445           | 0                  | 0.0307    | 0              | 0              | 0.1182         | 0.0155                  | 0.0318                    | 0.0634             | 0.0205               | 0           | 0           | <0.001    | 0.3809             |
| GSMM92438     | 0.361         | 0             | 0.0923       | 0          | 0                | 0.1052                    | 0                           | 0.0706                   | 0.0261                   | 0.0171             | 0.0244           | 0.008              | 0.0403    | 0.1728         | 0.0897         | 0.1195         | 0                       | 0                         | 0.0882             | 0                    | 0.1096      | 0.001       | 0.3776    |                    |
| GSMM92437     | 0.018         | 0             | 0.3184       | 0.0291     | 0                | 0.029                     | 0.0108                      | 0.0469                   | 0.0117                   | 0.0024             | 0.0352           | 0                  | 0         | 0.1605         | 0.0538         | 0.177          | 0.007                   | 0                         | 0.0698             | 0                    | 0.0306      | <0.001      | 0.4364    |                    |
| GSMM92436     | 0             | 0.0629        | 0.0333       | 0.0109     | 0.0199           | 0.0614                    | 0                           | 0.0119                   | 0                        | 0.0557             | 0                | 0                  | 0         | 0.2992         | 0.0011         | 0.239          | 0.0386                  | 0                         | 0                  | 0.1452               | 0           | 0.0301      | 0.003     | 0.3884             |
| GSMM92435     | 0             | 0             | 0.248        | 0.0037     | 0                | 0.1271                    | 0.055                       | 0                        | 0                        | 0.1116             | 0                | 0                  | 0         | 0.116          | 0.0243         | 0              | 0.1363                  | 0.0309                    | 0.0443             | 0                    | 0.1059      | 0           | 0.0052    | 0.3689             |
| GSMM92434     | 0.0542        | 0             | 0.4931       | 0          | 0.0241           | 0.0849                    | 0.0511                      | 0.0045                   | 0.002                    | 0                  | 0.0755           | 0                  | 0         | 0.0003         | 0              | 0.0758         | 0.0283                  | 0.0378                    | 0                  | 0.051                | 0           | 0.011       | <0.001    | 0.4911             |
| GSMM92433     | 0             | 0.0619        | 0.1383       | 0          | 0                | 0.0686                    | 0                           | 0.0816                   | 0.0057                   | 0.0867             | 0.0417           | 0                  | 0         | 0.1438         | 0.2559         | 0.1178         | 0.0116                  | 0.017                     | 0                  | 0.1609               | 0.0059      | 0.0328      | <0.001    | 0.4565             |
| GSMM92432     | 0             | 0.0032        | 0.0791       | 0.1005     | 0.0409           | 0                         | 0.0759                      | 0.0431                   | 0                        | 0                  | 0.0436           | 0                  | 0         | 0              | 0.0283         | 0.2694         | 0.1624                  | 0                         | 0                  | 0.1251               | 0           | 0.0284      | 0.02      | 0.1816             |
| GSMM92431     | 0.0547        | 0             | 0.0938       | 0.0058     | 0                | 0.1844                    | 0.073                       | 0.0992                   | 0                        | 0.0759             | 0.0461           | 0                  | 0         | 0.0096         | 0.0331         | 0.0928         | 0.0338                  | 0.037                     | 0                  | 0.1289               | 0.0319      | 0           | 0.001     | 0.3334             |
| GSMM92430     | 0.0637        | 0             | 0.2216       | 0.0494     | 0                | 0.0293                    | 0.0412                      | 0.0702                   | 0.015                    | 0                  | 0.074            | 0                  | 0         | 0.0796         | 0.0379         | 0.0098         | 0.022                   | 0.0684                    | 0                  | 0.0754               | 0.0028      | 0.0514      | 0.017     | 0.1905             |
| GSMM92429     | 0.0223        | 0             | 0.4524       | 0.0502     | 0.011            | 0.0067                    | 0                           | 0.0323                   | 0.0482                   | 0                  | 0.0478           | 0                  | 0         | 0.0427         | 0.0543         | 0.0516         | 0                       | 0                         | 0.1474             | 0.0147               | 0.0185      | <0.001      | 0.5781    |                    |
| GSMM92428     | 0             | 0.0168        | 0.0911       | 0.072      | 0                | 0.0628                    | 0                           | 0.0682                   | 0.0179                   | 0                  | 0.0584           | 0                  | 0         | 0.1306         | 0.012          | 0.1065         | 0.002                   | 0.0346                    | 0                  | 0.2814               | 0           | 0.0452      | 0.001     | 0.3319             |
| GSMM92427     | 0.0253        | 0             | 0.1519       | 0          | 0.04             | 0.2089                    | 0.0982                      | 0                        | 0                        | 0                  | 0.1335           | 0                  | 0         | 0.127          | 0.0244         | 0.0427         | 0.0091                  | 0                         | 0                  | 0.1149               | 0           | 0.024       | 0.129     | 0.1025             |
| GSMM92426     | 0.0332        | 0             | 0.2095       | 0.083      | 0.0227           | 0                         | 0.0361                      | 0.0497                   | 0.0485                   | 0.057              | 0.0306           | 0                  | 0         | 0.0902         | 0.0601         | 0.0717         | 0.0244                  | 0                         | 0                  | 0.1618               | 0.0216      | 0           | <0.001    | 0.565              |
| GSMM92425     | 0             | 0             | 0.0794       | 0.0306     | 0                | 0.0492                    | 0                           | 0.0321                   | 0.0382                   | 0                  | 0.0642           | 0                  | 0         | 0.3506         | 0.0331         | 0.0538         | 0                       | 0                         | 0                  | 0.2085               | 0           | 0.0702      | <0.001    | 0.2325             |
| GSMM92424     | 0.0394        | 0             | 0.0893       | 0          | 0.0892           | 0.1581                    | 0.0624                      | 0                        | 0                        | 0                  | 0.1597           | 0                  | 0         | 0.2002         | 0.0174         | 0.0011         | 0.0346                  | 0                         | 0                  | 0.1418               | 0           | 0.0069      | 0.058     | 0.1387             |
| GSMM92423     | 0.0184        | 0             | 0.2221       | 0.0060     | 0                | 0.203                     | 0.0053                      | 0.0639                   | 0.0218                   | 0                  | 0.0908           | 0                  | 0         | 0.0924         | 0.0345         | 0.0831         | 0.0136                  | 0.0391                    | 0.0175             | 0.0339               | 0           | 0           | 0.001     | 0.315              |
| GSMM92422     | 0.0023        | 0.0073        | 0.157        | 0.0939     | 0                | 0                         | 0.035                       | 0.0738                   | 0                        | 0                  | 0.0132           | 0                  | 0         | 0.1502         | 0.1042         | 0.1949         | 0.0684                  | 0                         | 0                  | 0.087                | 0           | 0.0127      | <0.001    | 0.4694             |
| GSMM92421     | 0             | 0.0342        | 0.0364       | 0          | 0                | 0.0861                    | 0.0536                      | 0.0359                   | 0                        | 0.0078             | 0.0806           | 0                  | 0         | 0.2217         | 0.038          | 0.2802         | 0.0067                  | 0                         | 0.0072             | 0.0814               | 0           | 0.0303      | 0.005     | 0.2779             |
| GSMM92420     | 0.0137        | 0             | 0.35         | 0.1339     | 0                | 0                         | 0.0611                      | 0.0602                   | 0.0218                   | 0.0454             | 0                | 0                  | 0         | 0.0435         | 0.1094         | 0.0115         | 0.0537                  | 0                         | 0                  | 0.0612               | 0           | 0.0146      | <0.001    | 0.6347             |
| GSMM92419     | 0             | 0             | 0.1133       | 0.0283     | 0                | 0.0919                    | 0                           | 0.026                    | 0.0392                   | 0                  | 0.0563           | 0                  | 0.0002    | 0.0853         | 0.0138         | 0.1489         | 0.1329                  | 0.0499                    | 0                  | 0.1882               | 0           | 0.026       | 0.001     | 0.3342             |
| GSMM92418     | 0.0424        | 0             | 0.1177       | 0          | 0.0235           | 0.0611                    | 0.1053                      | 0.0875                   | 0.0216                   | 0.0001             | 0.0641           | 0                  | 0         | 0.217          | 0.0739         | 0.0713         | 0.0193                  | 0                         | 0                  | 0.0855               | 0           | 0.0097      | 0.004     | 0.2969             |
| GSMM92417     | 0             | 0.0307        | 0.0312       | 0.0027     | 0.0362           | 0.0362                    | 0.0355                      | 0.0144                   | 0.0514                   | 0                  | 0                | 0                  | 0         | 0.249          | 0.0165         | 0.1768         | 0.0076                  | 0                         | 0                  | 0.0394               | 0           | 0           | <0.001    | 0.4617             |
| GSMM92416     | 0             | 0.0674        | 0.0987       | 0.0531     | 0                | 0.0067                    | 0                           | 0.0295                   | 0.0233                   | 0                  | 0.0606           | 0                  | 0         | 0.4239         | 0.008          | 0.0918         | 0.0028                  | 0                         | 0                  | 0.1281               | 0           | 0           | <0.001    | 0.5117             |
| GSMM92415     | 0.0476        | 0             | 0.3351       | 0          | 0.1168           | 0.1016                    | 0.0792                      | 0.0777                   | 0                        | 0                  | 0.1047           | 0                  | 0         | 0.0262         | 0              | 0              | 0.0321                  | 0.0558                    | 0                  | 0.154                | 0           | 0           | 0.008     | 0.2501             |
| GSMM92414     | 0             | 0             | 0.2792       | 0.005      | 0                | 0.1104                    | 0.0232                      | 0.0621                   | 0.0083                   | 0                  | 0.0591           | 0                  | 0         | 0.0531         | 0.0322         | 0.0496         | 0.0577                  | 0.0339                    | 0                  | 0.1624               | 0.0396      | 0.0243      | 0.01      | 0.2198             |
| GSMM92413     | 0.0002        | 0             | 0.1688       | 0.0479     | 0                | 0.0455                    | 0                           | 0.0389                   | 0.0103                   | 0.0045             | 0                | 0                  | 0         | 0.3525         | 0.0271         | 0.1638         | 0.0024                  | 0                         | 0                  | 0.1169               | 0.0009      | 0.0206      | <0.001    | 0.4776             |
| GSMM92412     | 0.0398        | 0             | 0.4038       | 0.0604     | 0                | 0.0758                    | 0                           | 0.1192                   | 0                        | 0                  | 0.0331           | 0                  | 0         | 0.0478         | 0.0594         | 0.0721         | 0.0132                  | 0                         | 0                  | 0.0484               | 0.0269      | 0           | <0.001    | 0.5308             |
| GSMM92411     | 0.051         | 0             | 0.1853       | 0          | 0.0953           | 0.0541                    | 0.1284                      | 0.0454                   | 0.0025                   | 0                  | 0.1325           | 0                  | 0         | 0.0745         | 0              | 0.0568         | 0.0115                  | 0.0415                    | 0                  | 0.121                | 0           | 0           | 0.017     | 0.1925             |
| GSMM92410     | 0             | 0             | 0.056        | 0.0155     | 0                | 0.0843                    | 0                           | 0.0186                   | 0.0189                   | 0                  | 0.0647           | 0                  | 0         | 0.4445         | 0.0393         | 0.1113         | 0.0183                  | 0                         | 0                  | 0.1281               | 0           | 0           | <0.001    | 0.423              |
| GSMM92409     | 0.0029        | 0             | 0.0927       | 0.133      | 0                | 0.019                     | 0.1021                      | 0.0272                   | 0.0224                   | 0.0198             | 0.0283           | 0                  | 0.0021    | 0.1213         | 0.1393         | 0.217          | 0.0392                  | 0.0132                    | 0.0063             | 0                    | 0           | 0.0041      | <0.001    | 0.7999             |
| GSMM92408     | 0.0041        | 0             | 0.0465       | 0          | 0.027            | 0.0388                    | 0                           | 0.0467                   | 0.0009                   | 0.0208             | 0.005            | 0                  | 0         | 0.1018         | 0.0506         | 0.0964         | 0.0318                  | 0.0518                    | 0                  | 0.2412               | 0           | 0.1881      | 0.001     | 0.3122             |
| GSMM92407     | 0.291         | 0             | 0.1282       | 0          | 0.0468           | 0.0647                    | 0.0608                      | 0.1772                   | 0.01                     | 0.005              | 0.0811           | 0                  | 0         | 0.3344         | 0              | 0.0781         | 0                       | 0.014                     | 0                  | 0.1306               | 0           | 0           | 0.001     | 0.708              |
| GSMM92406     | 0             | 0             | 0.1133       | 0.0253     | 0                | 0.0132                    | 0.0618                      | 0.0552                   | 0.0133                   | 0.01               | 0.0801           | 0                  | 0         | 0.219          | 0.0863         | 0.1683         | 0.0089                  | 0.0078                    | 0                  | 0.1179               | 0           | 0.0195      | <0.001    | 0.4269             |
| GSMM9         |               |               |              |            |                  |                           |                             |                          |                          |                    |                  |                    |           |                |                |                |                         |                           |                    |                      |             |             |           |                    |

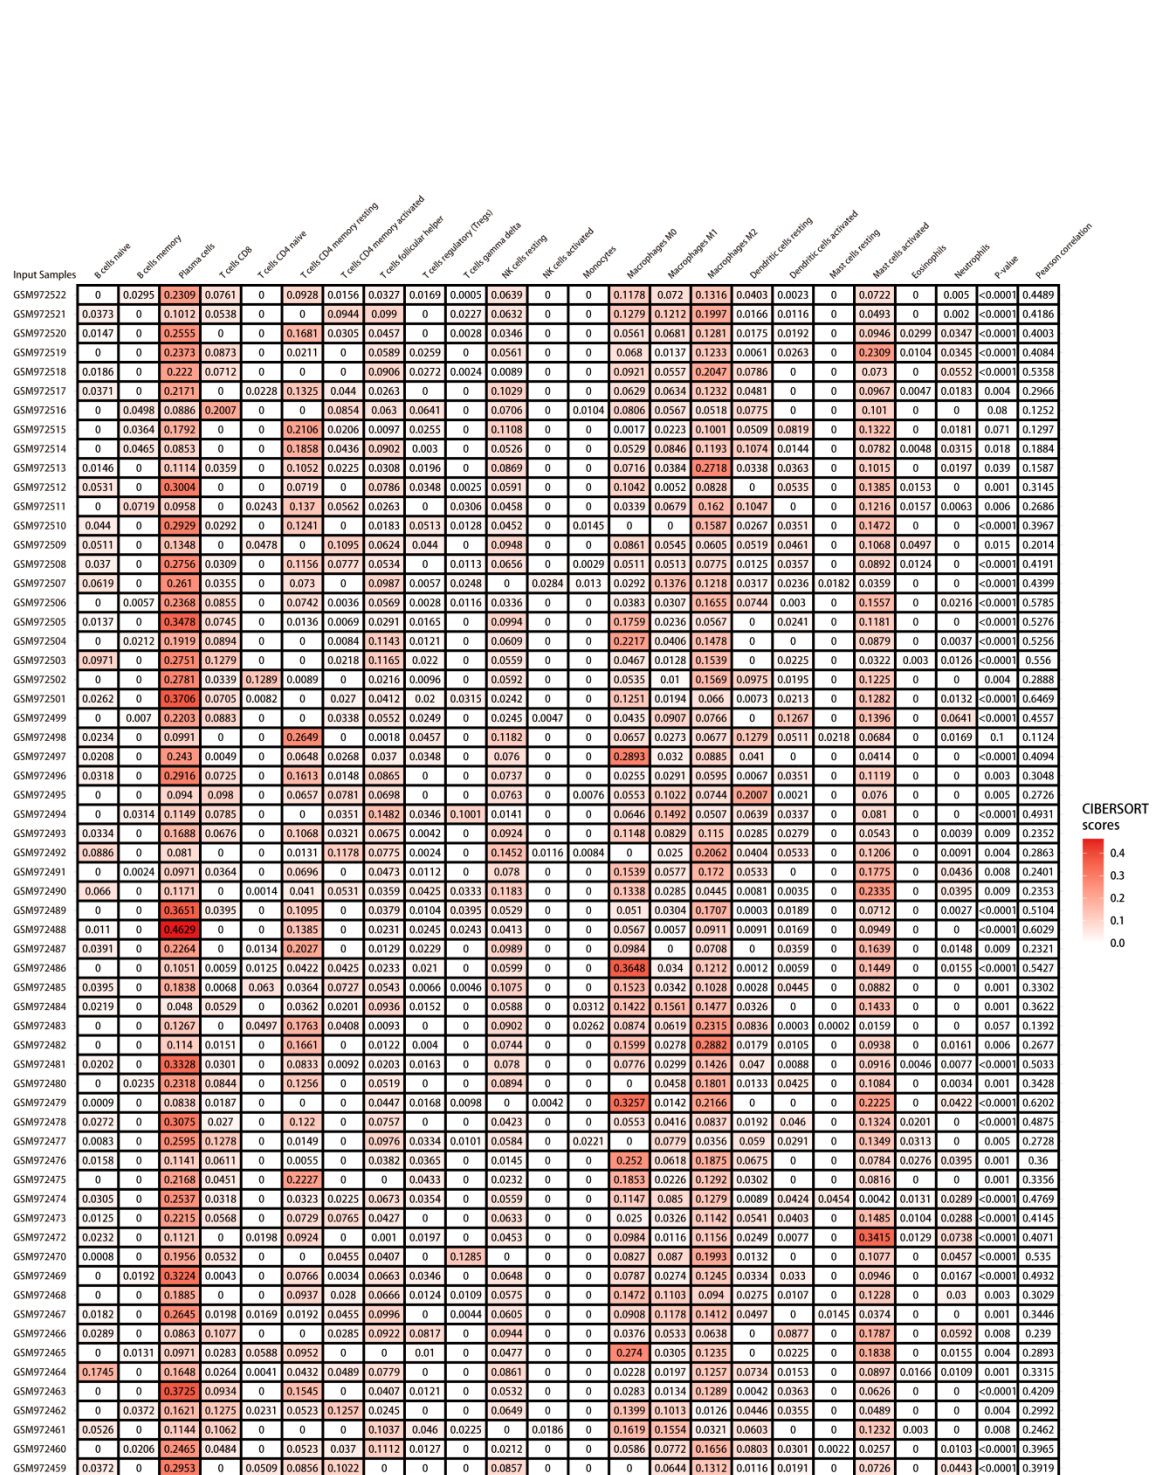

**Supplementary Figure S1.** Quantification of immune cell infiltration via CIBERSORT analysis of gene expression data from tumor samples of 562 patients in GSE39582. The heatmap displays the infiltration abundance of 22 immune cell subtypes in each sample. The color intensity shown in the right column is proportional to the CIBERSORT score. Corresponding  $p$ -values and Pearson correlation coefficients were also demonstrated. CIBERSORT: Cell-type Identification by Estimating Relative Subsets of RNA Transcripts.

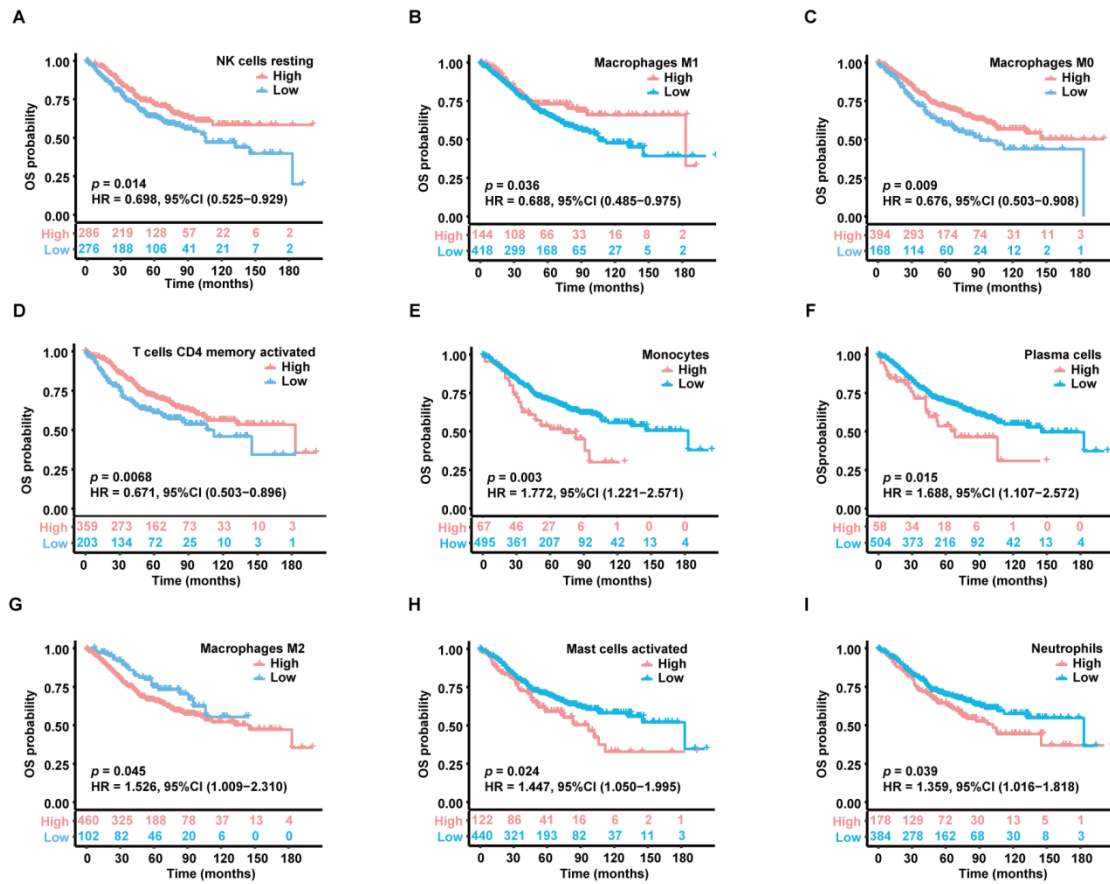

**Supplementary Figure S2.** KM analysis of immune cells significantly associated with CC prognosis, except for aDCs. Protective cell types include resting NK cells (**A**), M1-type macrophages (**B**), M0-type macrophages (**C**) and activated CD4+ memory T cells (**D**); whereas risk cell types encompass monocytes (**E**), plasma cells (**F**), M2-type macrophages (**G**), activated mast cells (**H**), and neutrophils (**I**). 562 patients were categorized into the high- and low-infiltration groups according to the optimal cutoff values of the CIBERSORT scores of each cell type. Numbers of individuals alive at different time points are labeled at the bottom. KM: Kaplan-Meier; CC: colon cancer; NK: natural killer.

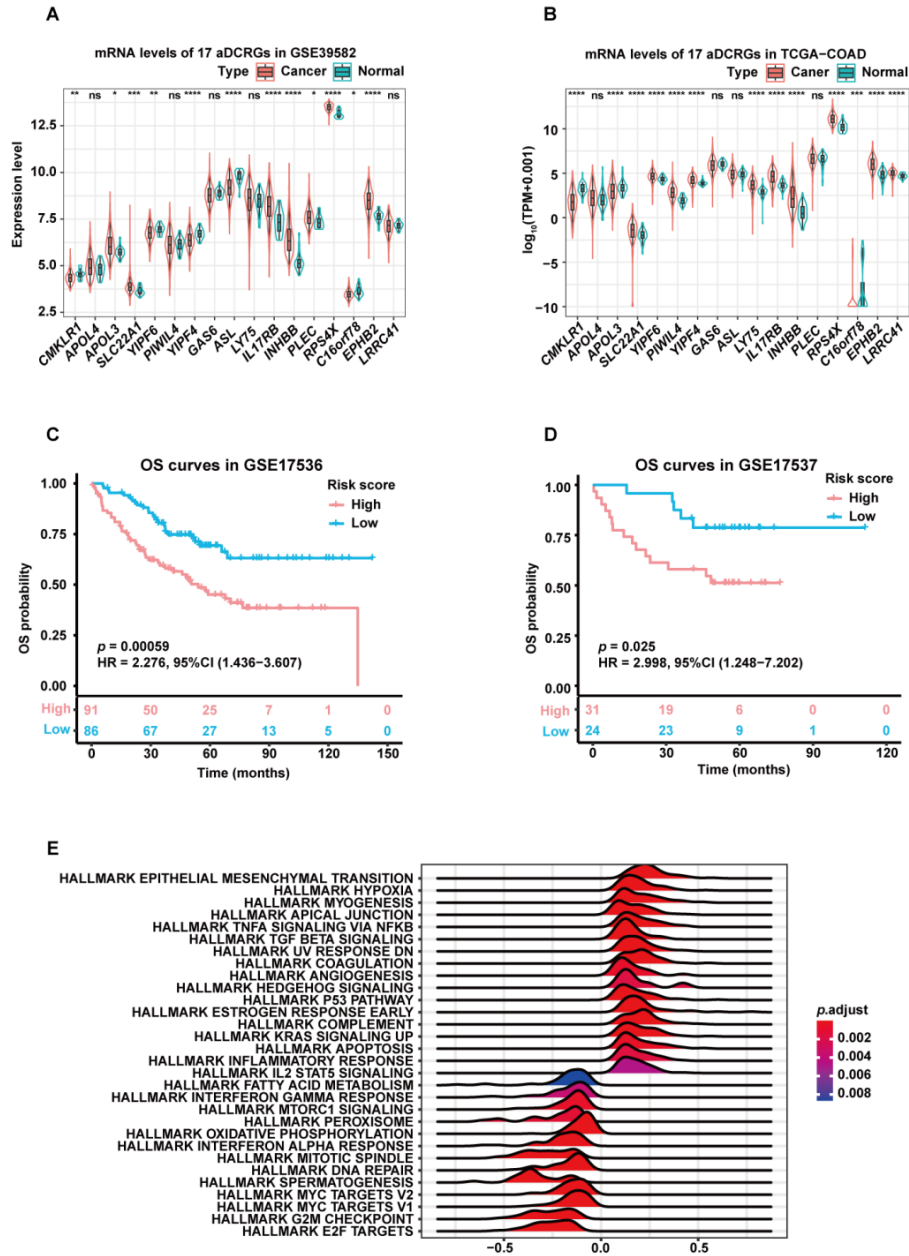

**Supplementary Figure S3.** Evaluation of mRNA levels of aDCRGs, KM analysis and GSEA. (A,B) Violin plots of the mRNA expression of 17 aDCRGs in tumor tissues and adjacent normal tissues based on the training set (A) and the second validation set (B). In the training set, statistical significance was determined by student's *t*-test for genes *YIPF6* and *YIPF4*, or by Wilcoxon-Mann-Whitney test for other genes. In the second validation set, statistical significance was determined by student's *t*-test for the gene *RPS4X*, or by Wilcoxon-Mann-Whitney test for other genes. \* $p < 0.05$ ; \*\* $p < 0.01$ ; \*\*\* $p < 0.001$ ; \*\*\*\* $p < 0.0001$ . ns: not significant. (C,D) KM survival curves of patients in the high- and low-risk groups based on the subset GSE17536 (C) and subset GSE17537 (D). Numbers of individuals alive at different time points are presented at the bottom. (E) GSEA based on hallmark gene sets elucidated the differences in enriched gene sets between the high- and low-risk groups in the training set. Enrichment results of 30 gene sets that exhibit significant differences between the two groups are demonstrated. A total of 17 gene sets with ES more than 0 are enriched in the high-risk group, while 13 gene sets with ES less than 0 are enriched in the low-risk group. Color intensity is proportional to the *p*-value as demonstrated in the right column.

aDCRG: aDC-related prognostic gene; GSEA: Gene Set Enrichment Analysis; OS: overall survival; ES: enrichment score.

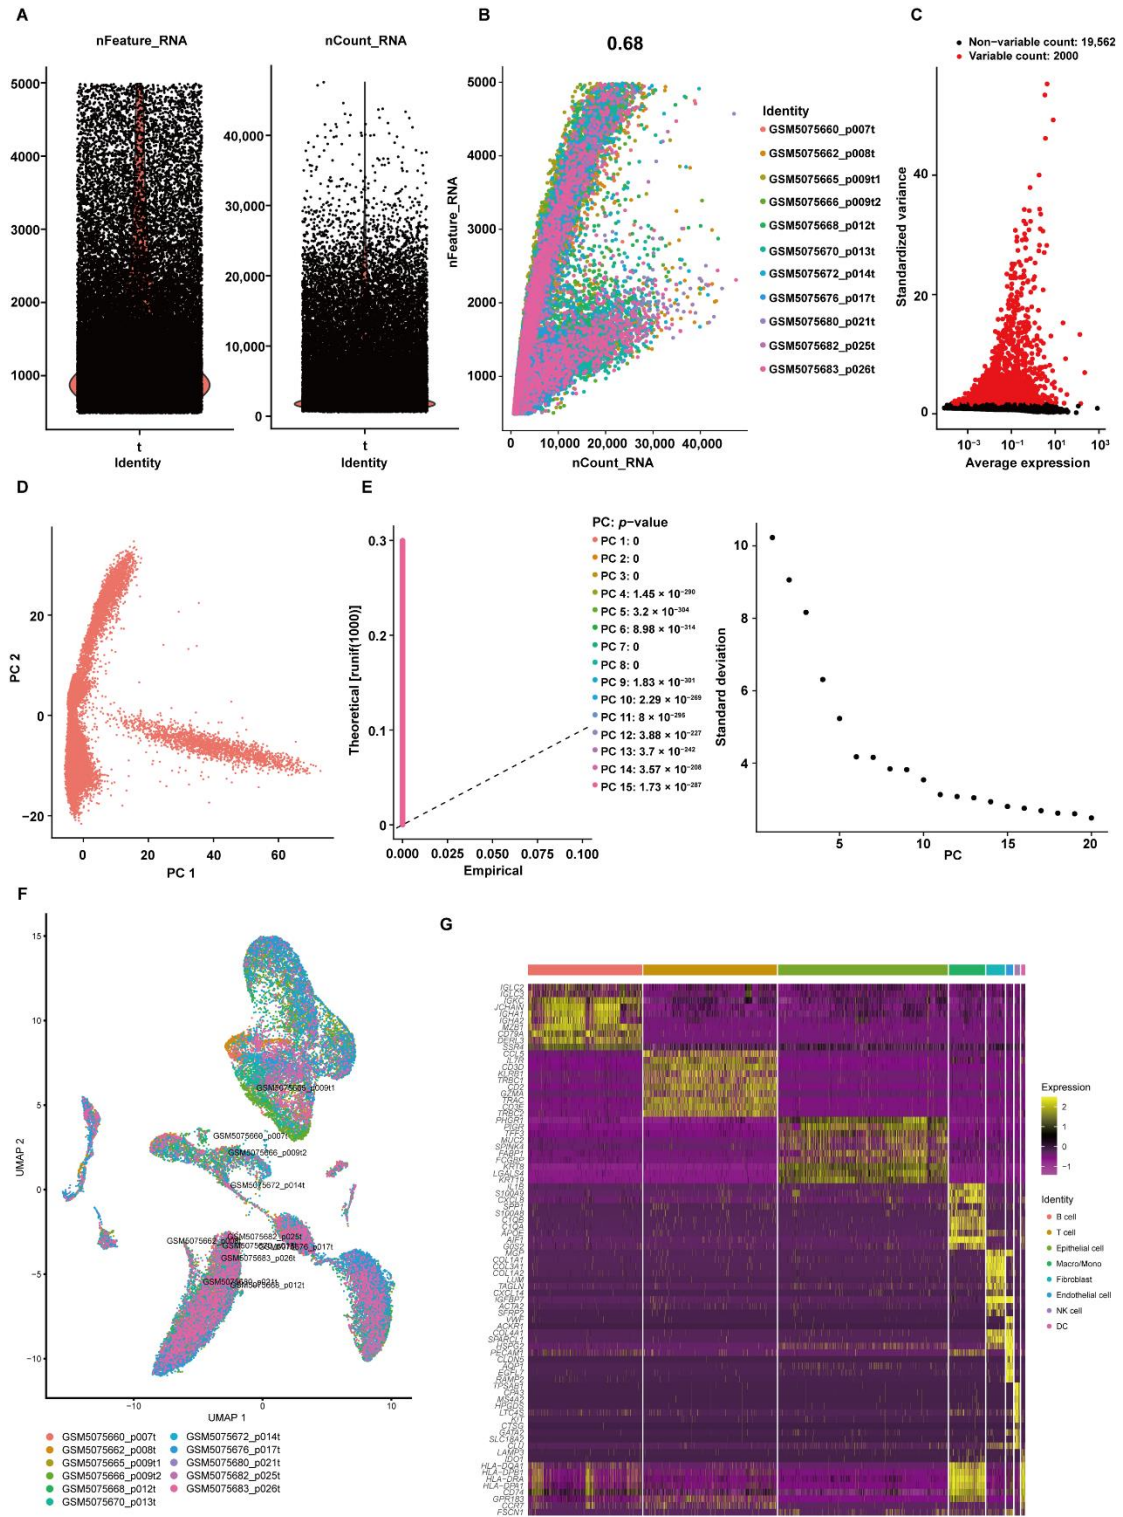

**Supplementary Figure S4.** Processing of scRNA-seq data. (A) Number of genes detected in each cell (nFeature\_RNA) and total number of molecules detected within a cell (nCount\_RNA). (B) The numbers of detected genes were significantly associated with the sequencing depth, with a Pearson's correlation coefficient of 0.68. (C) A variance diagram demonstrating 21,562 corresponding genes throughout all cells, with the red dots denoting highly variable genes and the black dots signifying non-variable genes. (D) Dimensionality reduction of all cells using PCA. (E) PCA screened out the top 15 PCs with an estimated

$p$ -value < 0.05. (F) The UMAP plot of cells from 11 tumor tissues of 10 CC patients. (G) A heatmap exhibiting the top 10 marker genes of each cell cluster. The colors from purple to yellow correspond to levels of gene expression from low to high. ScRNA-seq: Single-cell RNA sequencing; PCA: principal component analysis; PC: principal component; UMAP: uniform manifold approximation and projection; Macro/Mono: Macrophage/Monocyte.

## 1.2 Supplementary Tables

**Table S1.** Information of 67 CC patients in the TCGA-COAD dataset collected and curated by the CTR-DB.

| CTR-DB ID      | Therapeutic Regimen                             | Response |    | Non-response |    |
|----------------|-------------------------------------------------|----------|----|--------------|----|
|                |                                                 | CR       | PR | PD           | SD |
| CTR_RNAseq_10  | Cetuximab+Fluorouracil+Leucovorin+Oxaliplatin   | 1        | 0  | 0            | 1  |
| CTR_RNAseq_117 | Capecitabine                                    | 6        | 1  | 1            | 1  |
| CTR_RNAseq_133 | Bevacizumab+Fluorouracil+Irinotecan+Leucovorin  | 1        | 0  | 2            | 1  |
| CTR_RNAseq_136 | Fluorouracil                                    | 0        | 1  | 0            | 0  |
| CTR_RNAseq_146 | Capecitabine+Oxaliplatin                        | 1        | 0  | 1            | 0  |
| CTR_RNAseq_186 | Bevacizumab+Leucovorin                          | 1        | 0  | 0            | 0  |
| CTR_RNAseq_190 | Fluorouracil+Leucovorin                         | 1        | 0  | 0            | 0  |
| CTR_RNAseq_232 | Fluorouracil+Irinotecan+Leucovorin              | 2        | 0  | 1            | 0  |
| CTR_RNAseq_250 | Fluorouracil+Irinotecan+Leucovorin              | 0        | 0  | 1            | 0  |
| CTR_RNAseq_29  | Fluorouracil+Leucovorin+Oxaliplatin             | 0        | 0  | 3            | 1  |
| CTR_RNAseq_296 | Bevacizumab+Fluorouracil+Irinotecan+Leucovorin  | 0        | 0  | 1            | 0  |
| CTR_RNAseq_306 | Capecitabine                                    | 1        | 0  | 0            | 0  |
| CTR_RNAseq_308 | Fluorouracil+Leucovorin                         | 3        | 1  | 0            | 0  |
| CTR_RNAseq_346 | Fluorouracil+Leucovorin+Oxaliplatin             | 21       | 1  | 1            | 0  |
| CTR_RNAseq_394 | Bevacizumab+Fluorouracil+Oxaliplatin            | 1        | 1  | 0            | 0  |
| CTR_RNAseq_468 | Bevacizumab+Fluorouracil+Leucovorin+Oxaliplatin | 0        | 0  | 2            | 0  |
| CTR_RNAseq_49  | Fluorouracil                                    | 0        | 1  | 0            | 0  |
| CTR_RNAseq_70  | Fluorouracil+Leucovorin+Oxaliplatin             | 2        | 0  | 1            | 0  |
| CTR_RNAseq_8   | Capecitabine+Oxaliplatin                        | 1        | 0  | 1            | 0  |

CTR-DB: Cancer Treatment Response gene signature DataBase; RNA-seq: RNA sequencing; CR: Complete Response; PR: Partial Response; PD: Progressive Disease; SD: Stable Disease.
